# Supplementary material for: The structure of ferricytochrome c552from the psychrophilic marine bacterium Colwellia psychrerythraea 34H
Source: Royal Society of Chemistry journal article supplement (doi:10.1039/c4mt00045e), 2014-01-01
Supplement: c4mt00045e1.pdf [file c4mt00045e1.pdf]

**Table S1.** Crystallographic Data Collection and Refinement  
(Data in parentheses are for the highest resolution shell)

|                           |                                                                             |
|---------------------------|-----------------------------------------------------------------------------|
| Wavelength (Å)            | 0.97950                                                                     |
| Resolution range (Å)      | 19.95 - 2.002 (2.073 - 2.002)                                               |
| Space group               | C 1 2 1                                                                     |
| Unit cell                 | a = 130.28, b = 45.043, c = 87.574<br>$\alpha=90$ $\beta=90.85$ $\gamma=90$ |
| Total reflections         |                                                                             |
| Unique reflections        | 34186 (3176)                                                                |
| Multiplicity              | 3.49                                                                        |
| Completeness (%)          | 98.64 (93.19)                                                               |
| Mean I/sigma(I)           | 11.69 (6.39)                                                                |
| Wilson B-factor           | 23.44                                                                       |
| R-merge                   | 0.108                                                                       |
| R-work                    | 0.1701 (0.1662)                                                             |
| R-free                    | 0.2171 (0.2121)                                                             |
| Number of atoms           | 7440                                                                        |
| macromolecules            | 3393                                                                        |
| ligands                   | 277                                                                         |
| water                     | 204                                                                         |
| Protein residues          | 477                                                                         |
| RMS(bonds)                | 0.015                                                                       |
| RMS(angles)               | 1.53                                                                        |
| Ramachandran favored (%)  | 99                                                                          |
| Ramachandran outliers (%) | 0                                                                           |
| Clashscore                | 8.71                                                                        |
| Average B-factor          | 25.20                                                                       |
| macromolecules            | 25.40                                                                       |
| ligands                   | 19.30                                                                       |
| solvent                   | 29.20                                                                       |

```

      10          20          30          40          50
GDAAGKAK SVMCAACHGGA AGVSAVPTYP NLAGQKEAYL TKQLNDFKSG

      60          70          80          90          100
KRNDPTMKGM VMALSPADME NLAAYYANMK PGTKMIFAGI KKKTEREDLI

      109
AYLKKATNE

```

**Figure S1.** Amino acid sequence of cytochrome  $c_{552}$  from *Colwellia psychrerythraea*, numbered to be consistent with cyt  $c_{552}$  from *Marinobacter hydrocarbonoclasticus*. Labeled in bold are the covalent heme attachments (Cys14 and Cys17) and the native axial metal-binding residues (His18 and Met57).

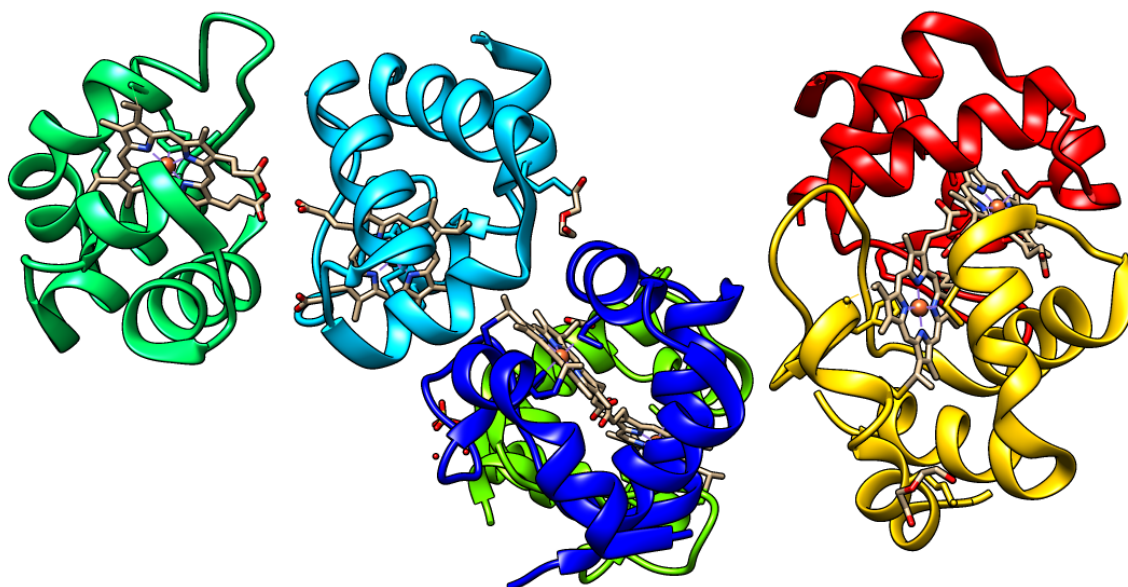

**Figure S2.** Molecular structure of *Cpcyt*  $c_{552}$  showing the three dimer pairs in the asymmetric unit.

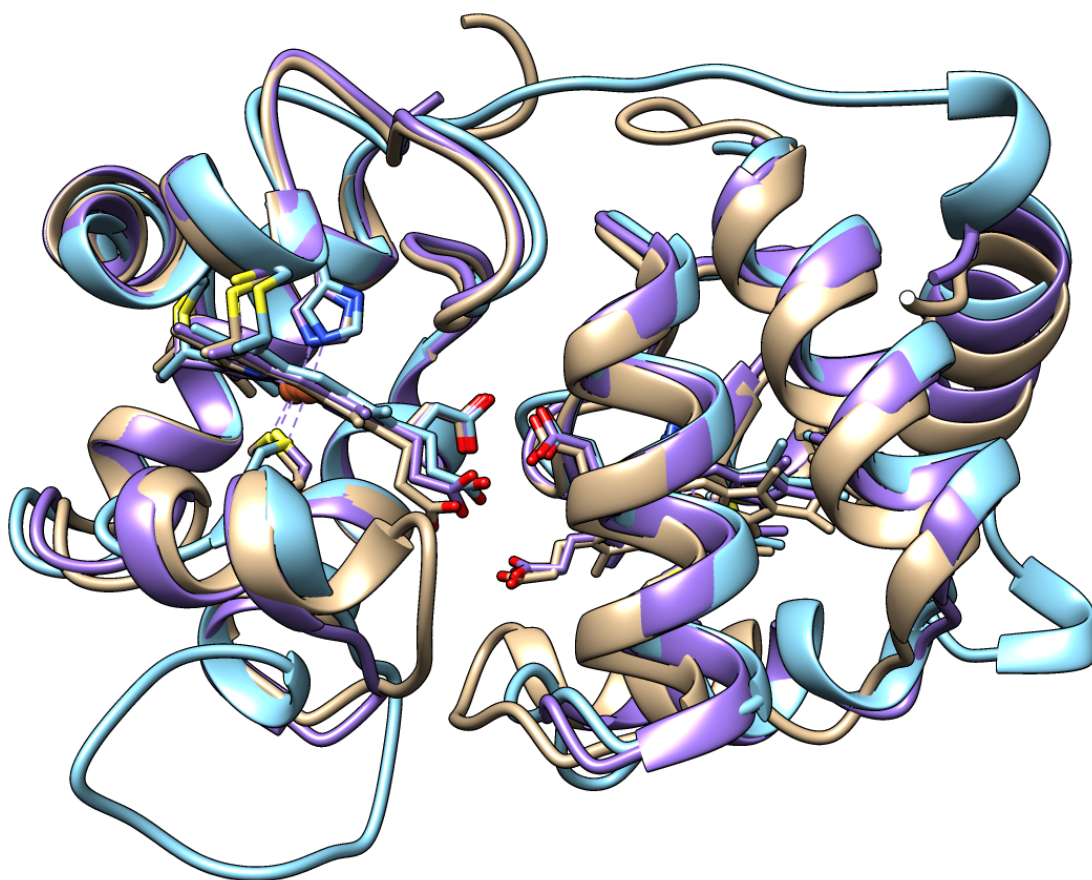

**Figure S3.** Superposition of the structures of a *Cpcyt c<sub>552</sub>* dimer (4O1W, purple), a *Mhcyt c<sub>552</sub>* dimer (1CNO, tan), and the two-heme *cyt c<sub>4</sub>* from *Pseudomonas stutzerii* (1ETP, blue).

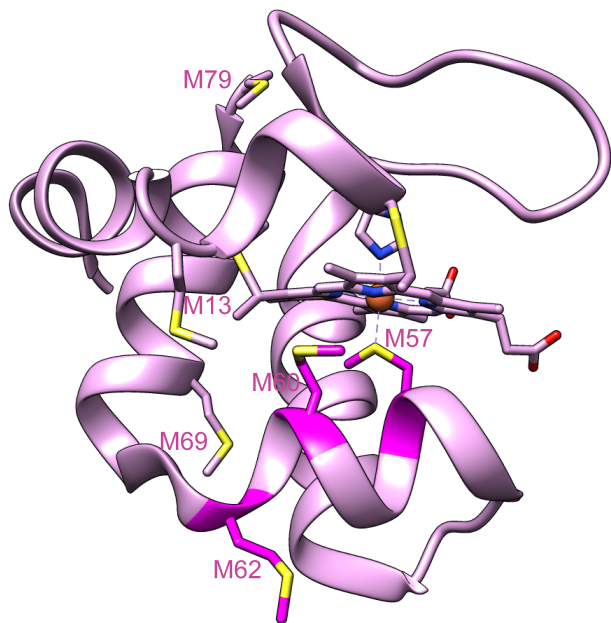

**Figure S4.** Structure of *Cpcyt c<sub>552</sub>* monomer showing the position of the six methionine residues. Met57 (the axial methionine), Met60, and Met 62 are shown in darker magenta and are highly conserved in psychrophilic cytochromes. Met13, Met69, and Met79 are shown in lighter pink and are conserved as hydrophobic amino acids but not specifically as methionine.

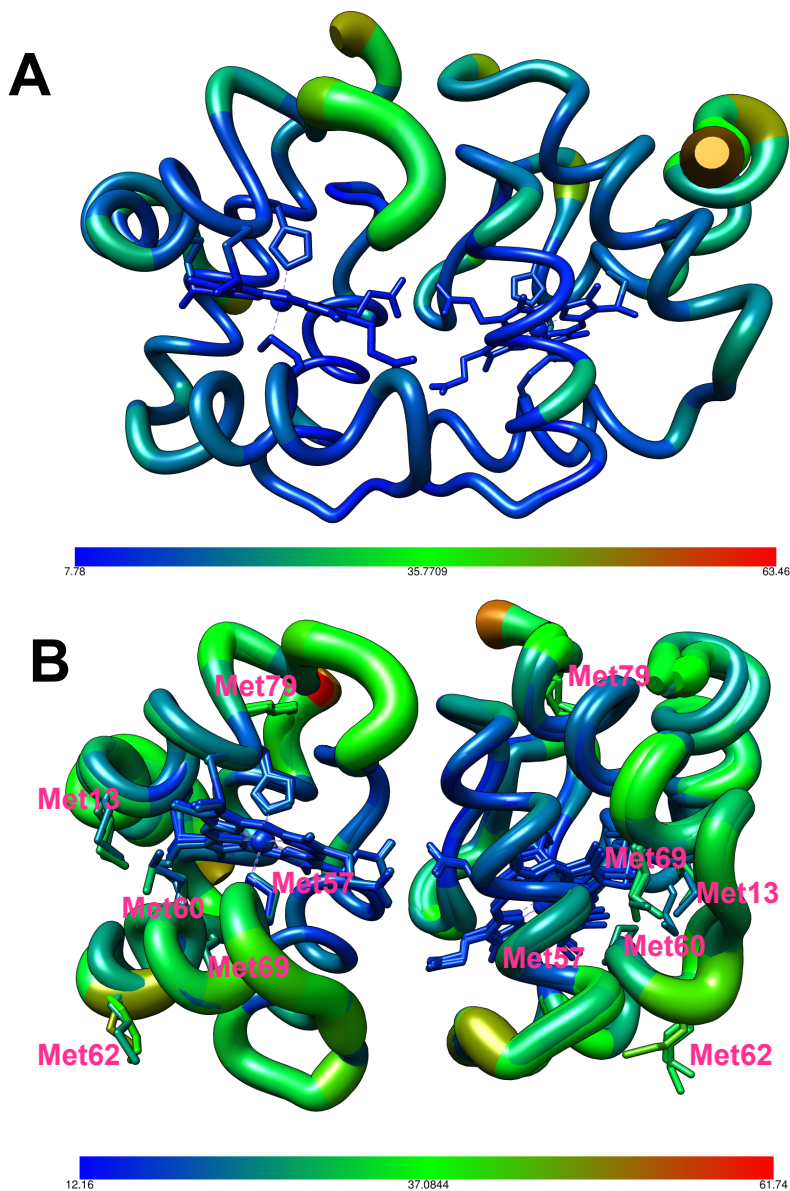

**Figure S5.** Structures of *cyt c<sub>552</sub>* colored by residue-averaged B-factor. The structures are depicted using “worms,” with the diameter of the “worm” proportional to the B-factor. The greater average B-factors for the *Cpcyt c<sub>552</sub>* (**B**) structure, particularly in the outer portions of the structure, are consistent with greater flexibility and dynamics than observed for the *Mhcyt c<sub>552</sub>* structure (**A**).

**A.** Structure of *Mhcyt c<sub>552</sub>* (PDB: 1CNO) **B.** Structure of *Cpcyt c<sub>552</sub>* (PDB: 4O1W). The three dimers found in the asymmetric unit are superposed. Methionine residues are highlighted. Met62 in particular exhibits relatively high B-factors, consistent with high flexibility or dynamics.

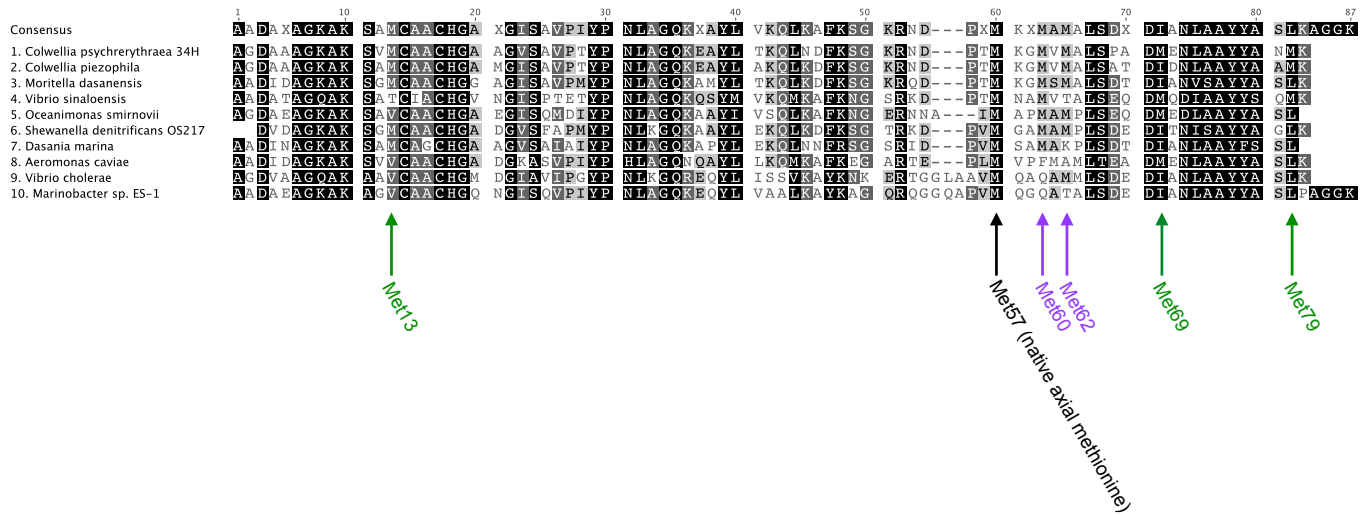

**Figure S6.** Sequence alignment of ten homologous cytochrome *c* sequences. Sequences 1-3 are from psychrophiles, sequences 4-7 are from psychrotolerant species, and sequences 8-10 are from mesophiles. Met60 and Met62 are highly conserved as methionines in psychrophiles, fairly well-conserved in psychrotolerant species, and not well-conserved in mesophiles. Met13, Met69 and Met79 are well conserved as hydrophobic residues (e.g., Met, Ile, Leu, Val) but not necessarily as methionine. The trends exemplified here are also observed in a larger sequence alignment that includes the top 100 sequences from a BLAST search of *Cpcyt c*<sub>552</sub> against the NCBI nr protein database.

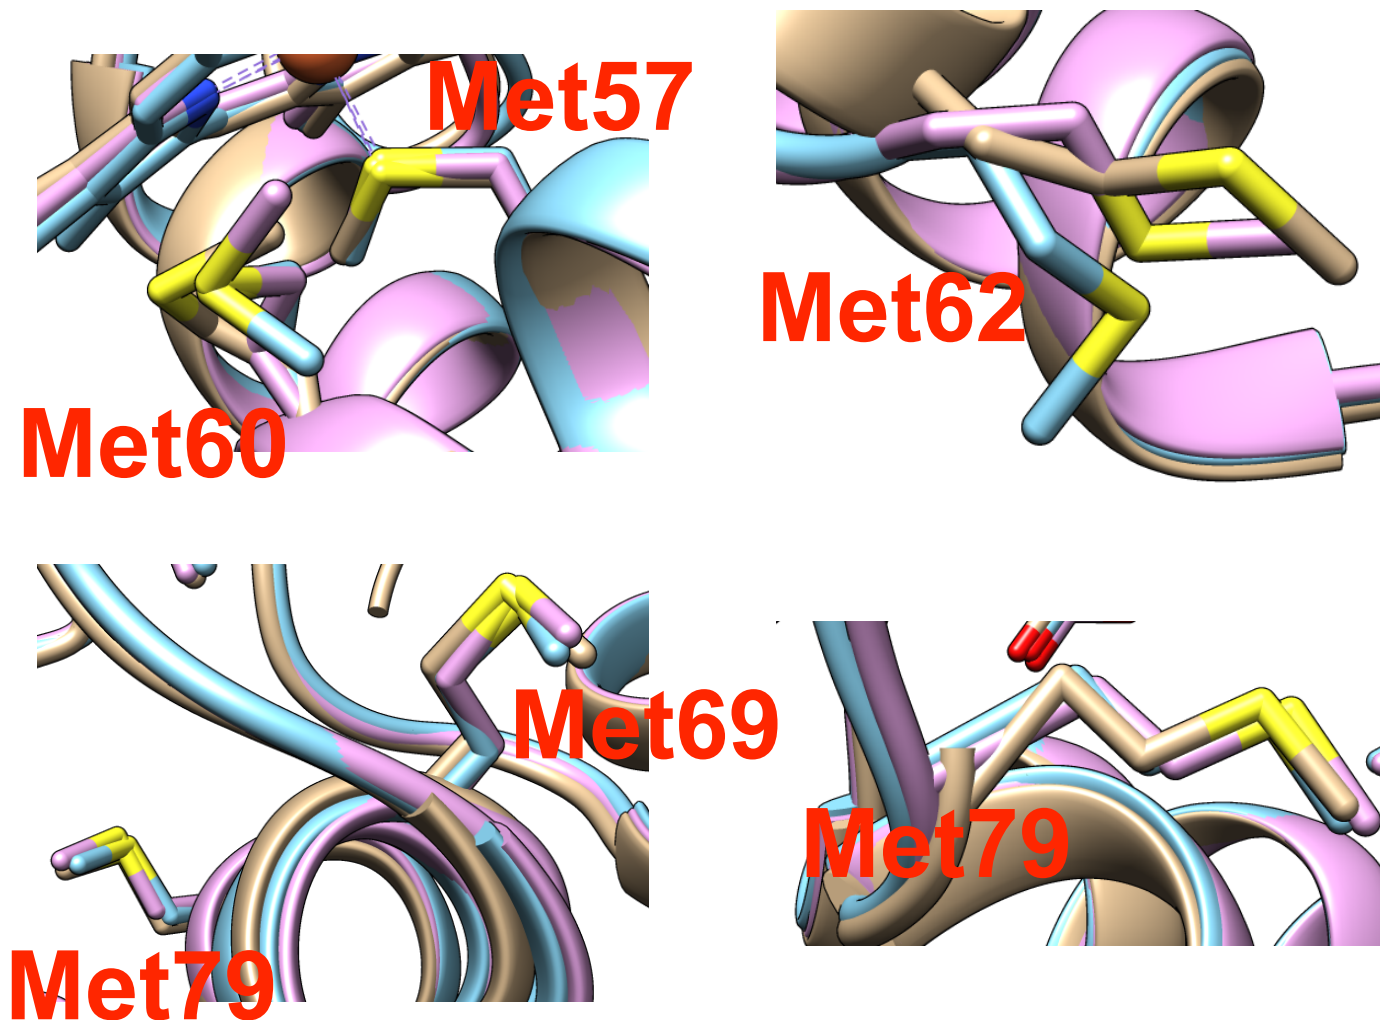

**Figure S7.** Superposition of the three dimers found in the *Cpcyt c552* asymmetric unit highlighting the methionine residues, with chain A in purple, chain C in blue, and chain E in tan. There are substantial differences in the positions of Met60 and Met62 in each of the three chains. By contrast, Met69, Met79, and Met57 (the axial methionine) from each chain are highly superposable.

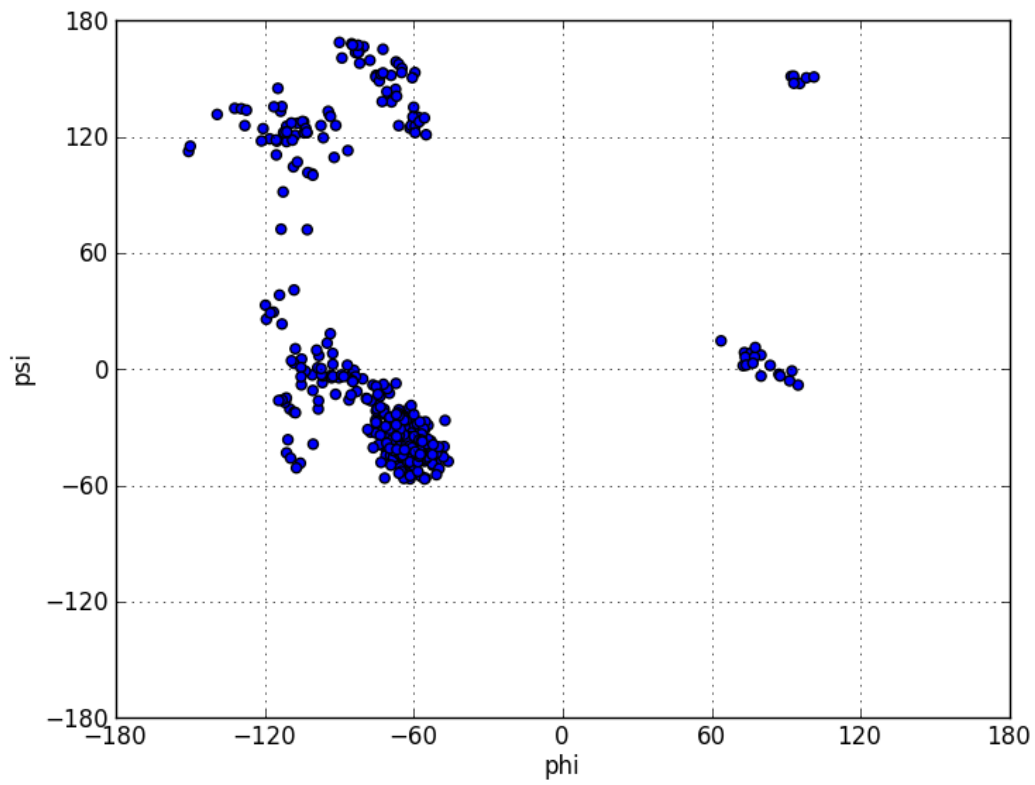

**Figure S8.** Ramachandran plot for *Cpcyt c<sub>552</sub>*.
